# Supplementary material
Source: publisher figshare collection journal article supplement (https://acs.figshare.com/ndownloader/files/4403824)
Supplement: Supplementary file 1 [file 4403824]

## Supporting Information for ACS Applied Materials and Interfaces

### Cohesive force change induced by polyperoxide degradation for application to dismantlable adhesion

Eriko Sato,\* Hiroshi Tamura, and Akikazu Matsumoto

#### Contents

FIGURE S-1. TG/DTA curves.

FIGURE S-2. Photograph of glass joints bonded by PP network PEG-D.

FIGURE S-3. Photograph of aluminum joints bonded by network PP-HES ([-OH]:[-NCO] = 100:100).

FIGURE S-4. Confocal laser scanning microscope images of adhesive failure surface.

FIGURE S-5. Lap-shear strength-displacement curves of aluminum joints bonded by network PP-HES ([-OH]:[-NCO] = 100:50).

FIGURE S-6. Lap-shear strength-displacement curves of aluminum joints bonded by network PP-HES ([-OH]:[-NCO] = 100:25).

FIGURE S-7. Photograph of aluminum joints bonded by network PP-HES ([-OH]:[-NCO] = 100:25).

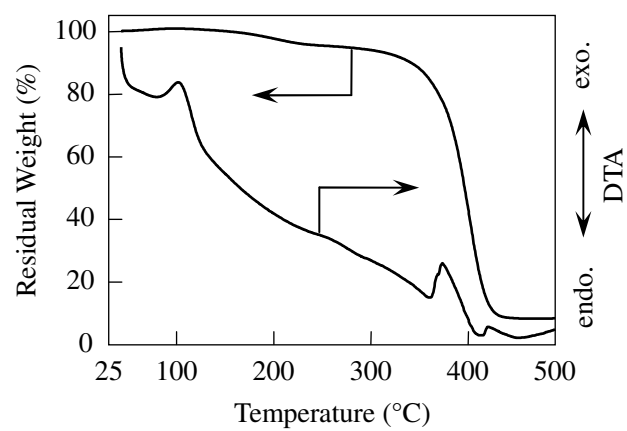

**FIGURE S-1.** TG/DTA curves of the PP-network PEG-D.

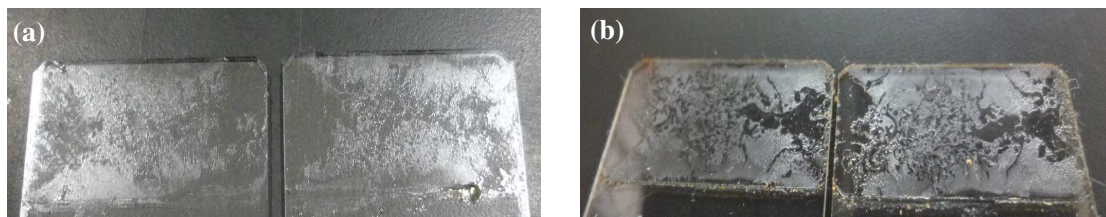

**FIGURE S-2.** Glass joints bonded by PP network PEG-D after lap-shear adhesive tests (a) before and (b) after heating at 110°C for 2 h.

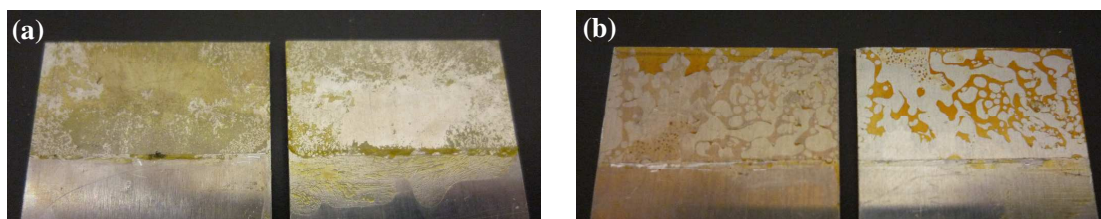

**FIGURE S-3.** Test joints bonded by network PP-HES ( $[-\text{OH}]:[-\text{NCO}] = 100:100$ ) after lap-shear adhesive test (a) before and (b) after heating at  $110^{\circ}\text{C}$  for 2 h.

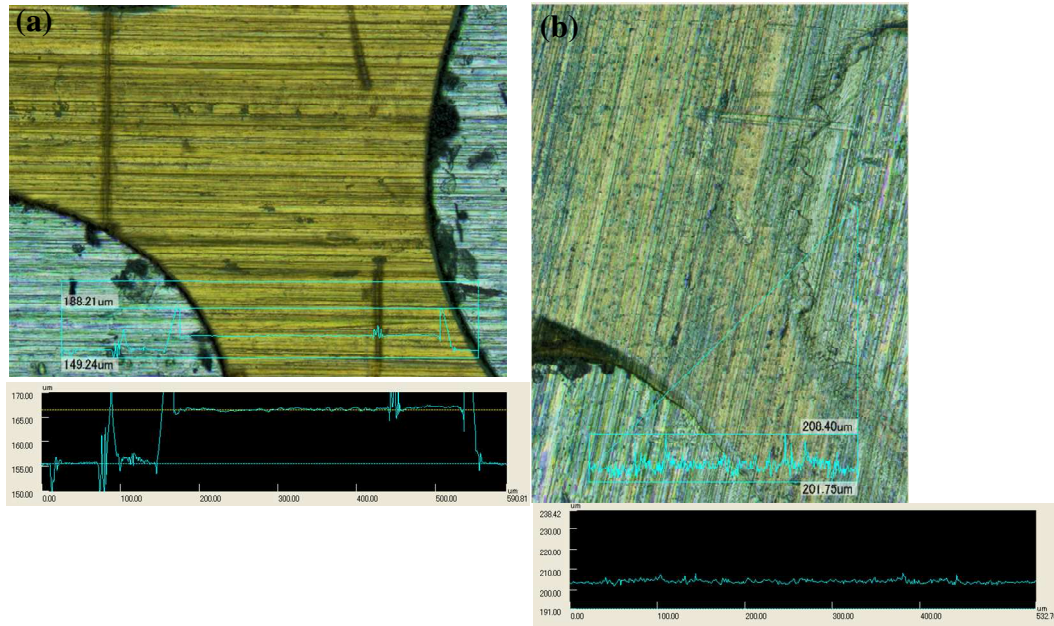

**FIGURE S-4.** The confocal laser scanning microscope images of the adhesive failure surfaces (upper) and cross-section view (bottom); (a) The specimen with adhesive layer and (b) the specimen without adhesive layer; the specimen was bonded by network PP-HES and was heated at 110°C for 2 h.

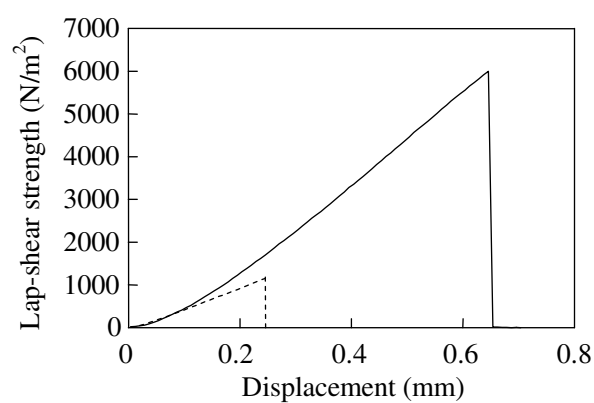

**FIGURE S-5.** The representative lap-shear strength-displacement curves of aluminum joints bonded by network PP-HES;  $[-\text{OH}]:[-\text{NCO}] = 100:50$  before ( — ) and after ( --- ) heating at  $110^{\circ}\text{C}$  for 2 h.

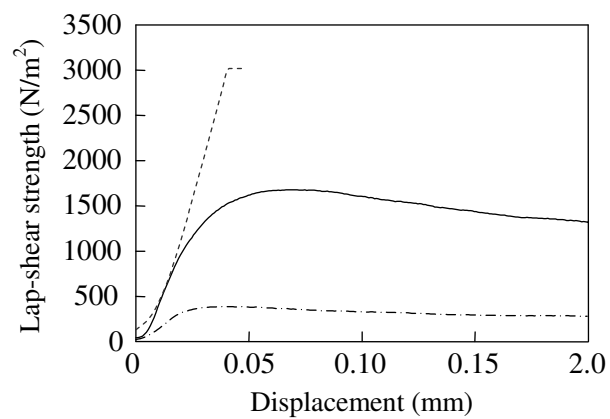

**FIGURE S-6.** The representative lap-shear strength-displacement curves of aluminum joints bonded by network PP-HES; [-OH]:[-NCO] = 100:25 before ( — ) and after ( --- ) heating at 110°C for 2 h, and [-OH]:[-NCO] = 100:10 before heating ( -.-.- )

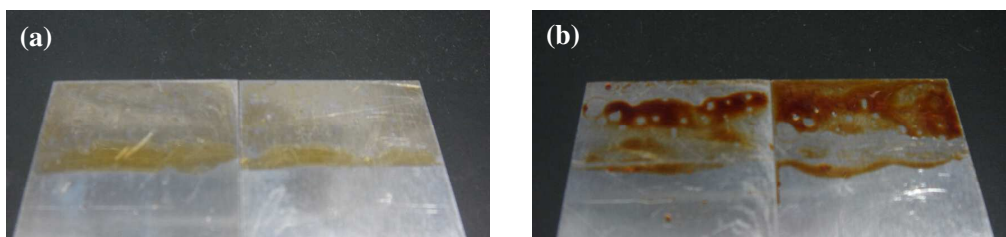

**FIGURE S-7.** Test aluminum joints bonded by network PP-HES ( $[-\text{OH}]:[-\text{NCO}] = 100:25$ ) after lap-shear adhesive test (a) before and (b) after heating at  $110^{\circ}\text{C}$  for 2 h.
